# Supplementary material
Source: Springer Nature journal article supplement (https://www.springermedizin.de/resource/supplementary/12913_2013_3096_MOESM2_ESM.pdf/9532408)

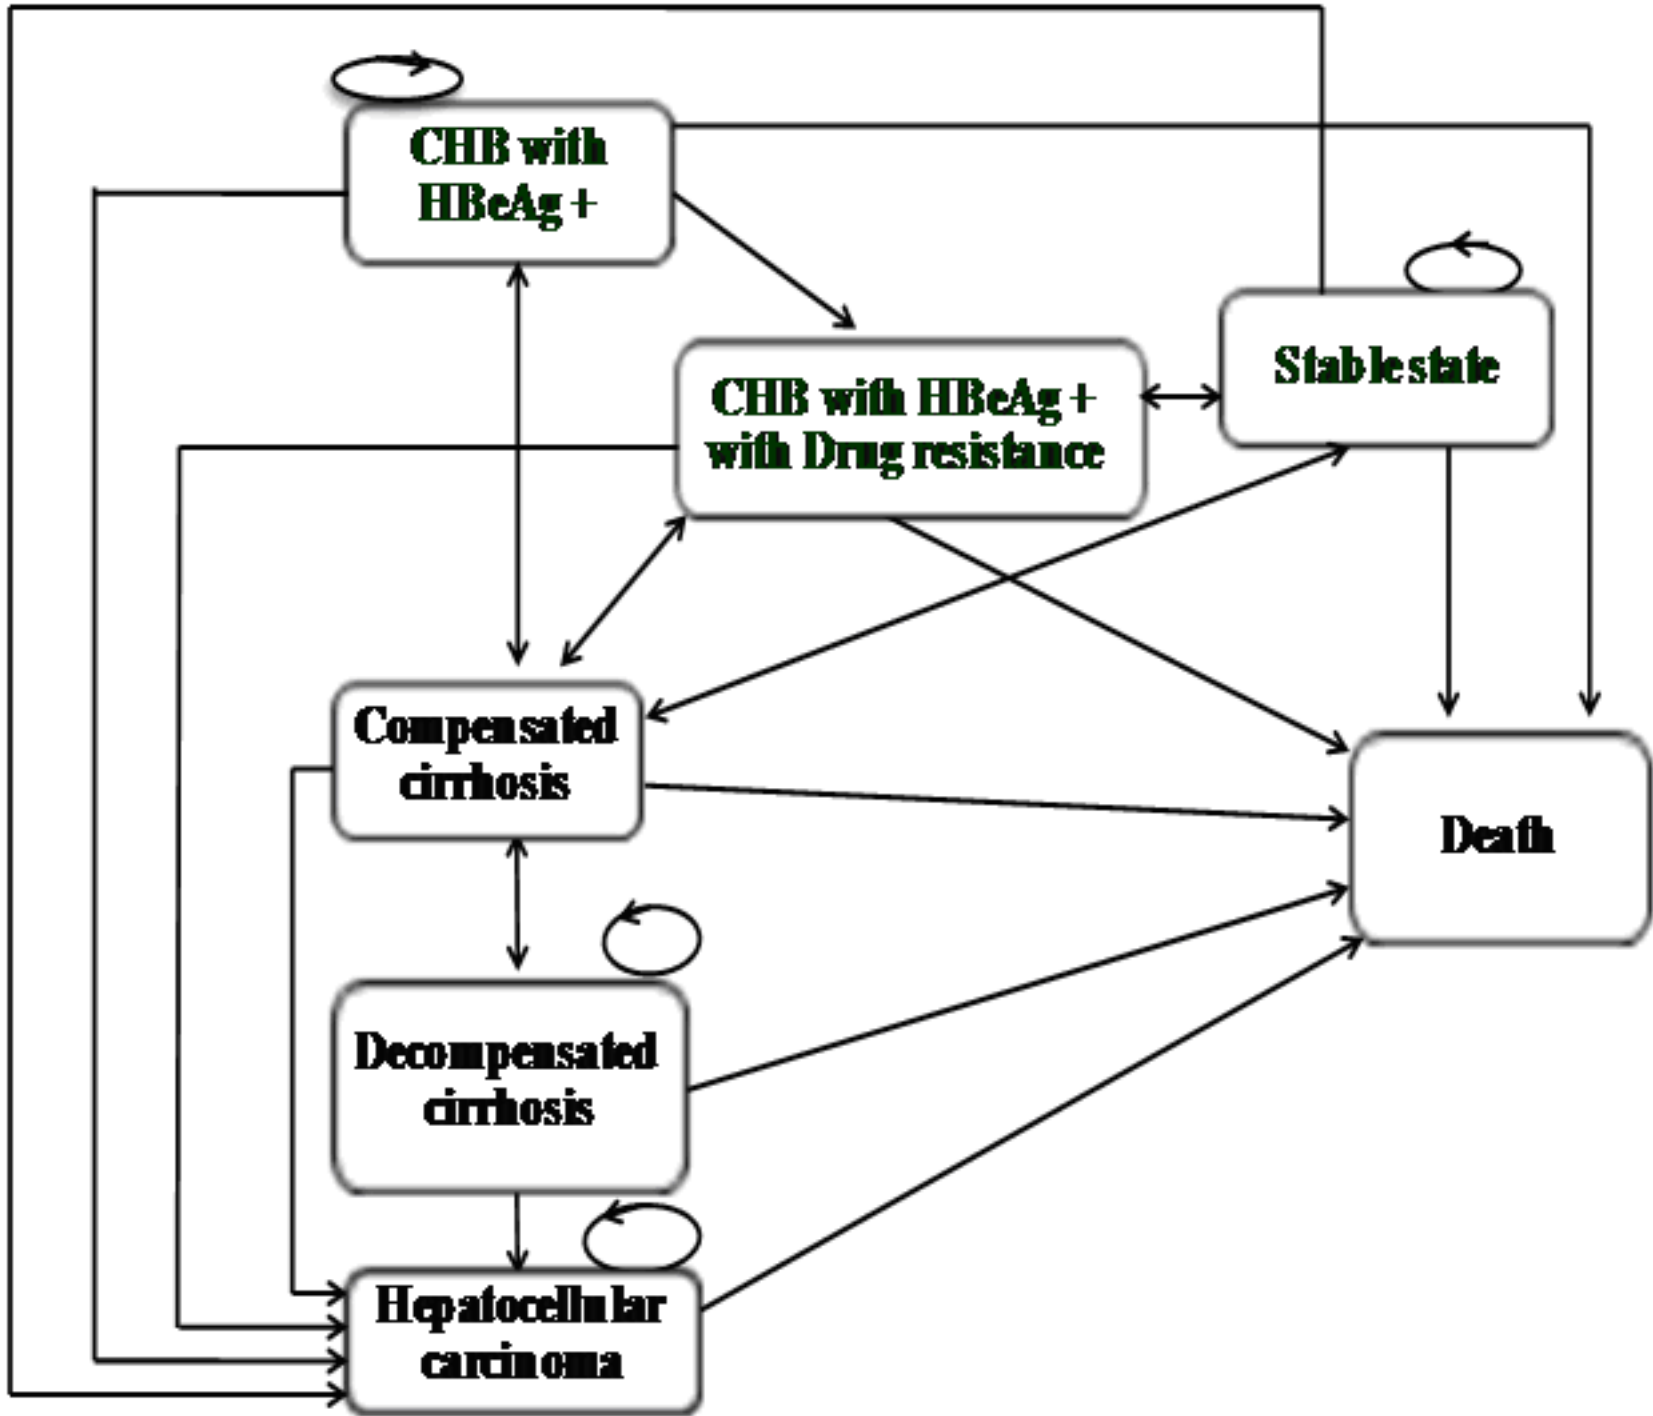

Supplement: MOESM2 [file 9532408]
